# Supplementary material for: Identification of proteins associated with clinical and pathological features of proliferative diabetic retinopathy in vitreous and fibrovascular membranes
Source: PubMed Central journal article supplement (PMC5667868; doi:10.1371/journal.pone.0187304), 2017-11-02
Supplement: pone.0187304.s002.pdf [file pone.0187304.s002.pdf]

**Table S2. Primer details.** Gene nomenclature, Gen bank accession code, primer sequences, and size (bp) and predicted Tm of the amplified products.

| Unigene symbol | Description                                  | GenBank      | Forward primer             | Reverse primer             | bp  | Tm |
|----------------|----------------------------------------------|--------------|----------------------------|----------------------------|-----|----|
| ADIPOQ         | Adiponectin                                  | NM_004797    | GAAAGGAGATCCAGGTCTTATTGGTC | AAAGCCTCGGGGACCTTCAG       | 82  | 81 |
| ANGPT2         | Angiopoietin 2                               | NM_001147    | GCAAAATAAGCAGCATCAGCCAAC   | GCATCAAACCACCAGCCTCCT      | 115 | 76 |
| BDNF           | Brain-derived Neurotrophic Factor            | NM_001143805 | CCCAGTTCCACCAGGTGAGAA      | CCTCGGATGTTTGCTTCTTTCAT    | 109 | 78 |
| CTGF           | Connective tissue growth factor              | NM_001901    | ACCAATGACAACGCCTCCTGC      | CGGATGCACTTTTTGCCCTTCTTA   | 110 | 82 |
| GDF15          | Growth Differentiation Factor 15             | NM_004864    | ACGCTACGAGGACCTGCTAACC     | CAGCCGCACTTCTGGCGTGAGTAT   | 112 | 85 |
| GDNF           | Glial Cell Line-derived Neurotrophic Factor  | NM_000514    | GCAGTGACTCAAATATGCCAGAGG   | CCTGCCGATTCCGCTCTCTT       | 141 | 78 |
| HGF            | Hepatocyte Growth Factor                     | NM_000601    | GGACCATGTGAGGGGGATTATG     | CCACGACCAGGAACAATGACA      | 89  | 78 |
| ICAM1          | Intercellular Adhesion Molecule 1            | NM_000201    | GACAGGGCATTGTCCTCAGTCAGA   | CAGATCAGATGCGTGGCCTAGTGT   | 87  | 79 |
| IGFBP1         | Insulin-like Growth Factor-Binding Protein 1 | NM_000596    | TGGAAGGAGCCCTGCCGAATA      | GGATGTCTCACACTGTCTGCTGTG   | 147 | 79 |
| IGFBP3         | Insulin-like Growth Factor-Binding Protein 3 | NM_000598    | AAGACAGCCAGCGCTACAAAG      | TACGGCAGGGACCATATTCTG      | 103 | 80 |
| NCAM1          | Neural Cell Adhesion Molecule 1              | NM_000615    | AAGACGCAGCCAGTCCAAGG       | TGTTTTCCACTCGGAGGAGAGC     | 165 | 84 |
| NGF            | Nerve Growth Factor (beta-polypeptide)       | NM_002506    | CACTGAGGTGCATAGCGTAATGTC   | CTGAGTGTGGTTCCGCCTGTAT     | 86  | 78 |
| NGFR           | Nerve growth factor receptor                 | NM_002507    | GCCTACATAGCCTTCAAGAGGTGGA  | TGCTGGTCATGCAGGCTCTG       | 152 | 84 |
| NOV            | Nephroblastoma Overexpressed                 | NM_002514    | CAAGAGCCAGAGCAGCCAACAGAT   | TGGTATTGTGGGGAGTGCAGCAG    | 169 | 83 |
| NRG1           | Neuregulin 1                                 | NM_013956    | CGTGAATCAAACGAGATCATCA     | GCTTGCCAGTGGTGGATGT        | 122 | 78 |
| NRG2           | Neuregulin 2                                 | NM_004883    | CCACGGAACAGCCCTTAGTCTTTA   | CCGTCTGGCTTTCATCTTCTTC     | 141 | 83 |
| NTF3           | Neurotrophin 3                               | NM_002527    | GTCCGAGCACTGACTTCAGAGAA    | AAGGCACACACAGGACGTGTCTA    | 80  | 79 |
| NTF4           | Neurotrophin 4                               | NM_006179    | TCGAATTGACACTGCCTGCGTCT    | CCAAACTGGGGTCTTAGATCAGC    | 136 | 84 |
| PDGFA          | Platelet Derived Growth Factor Subunit A     | NM_002607    | AAAGCAGCCAACCAGATGTGAGGT   | CGGACACAGTTTTTACGGAGGA     | 151 | 81 |
| PDGFB          | Platelet Derived Growth Factor Subunit B     | NM_002608    | TGCTGCTACCTGCGTCTGGTCA     | CAGGCGTTGGAGATCATCAAAGGA   | 108 | 83 |
| PIGF1          | Human Placenta Growth Factor 1               | NM_002632    | TCACCATGCAGCTCCTAAAGATC    | ACAGCATCGCCGCACCTTTC       | 133 | 85 |
| THBS1          | Thrombospondin 1                             | NM_003246    | GCTGCACTGAGTGTCACTGTCAGAA  | GCGAGGACAGCATTCTCCATCA     | 110 | 81 |
| TIMP1          | Tissue Inhibitor of Metalloproteinase 1      | NM_003254    | ACTTCCACAGGTCCCACAACCG     | AGGGAAACTGTGCATTCTCAC      | 180 | 84 |
| VIM            | Vimentin                                     | NM_003380    | CAGATTCAGGAACAGCATGTCCAAA  | AGGTCAGCAAACCTGGATTTGTACCA | 152 | 81 |
